# Supplementary material
Source: Springer Nature journal article supplement (https://www.springermedizin.de/resource/supplementary/12875_2014_1102_MOESM2_ESM.pdf/9435824)
Supplement: MOESM2 [file 9435824]

Databases systematic search identified **2 946** records

Medline  
1061

EMbase  
1732

PsycInfo  
74

Cochrane  
77

Others  
2

Screening  
of records

Duplicates and  
excluded  
**2801**

Abstracts  
selected  
**145**

Article not  
found  
**1**

Additional  
abstracts  
(manual search  
of the lists of  
references)  
**21**

Full-texts  
assessed  
for  
eligibility  
**165**

Excluded  
(no relevant  
content)  
**76**

Final selection  
**89** articles
